# Supplementary material for: Light-soaking free organic photovoltaic devices with sol–gel deposited ZnO and AZO electron transport layers
Source: Royal Society of Chemistry journal article supplement (doi:10.1039/c8ra07071g), 2018-01-01
Supplement: c8ra07071g1.pdf [file c8ra07071g1.pdf]

Supporting information

## Light-soaking Free Organic Photovoltaic Devices with Sol-gel Deposited ZnO and AZO Electron Transport Layers

Zenan Jiang<sup>1</sup>, S. Soltanian<sup>1</sup>, Bobak Gholamkhass<sup>1</sup>, Abdullah Aljaafari<sup>2</sup>, Peyman Servati<sup>1</sup>

1. Department of Electrical and Computer Engineering, University of British Columbia, 2332 Main Mall, Vancouver, BC, Canada V6T 1Z4
2. College of Engineering, King Faisal University, Al-Hasa 31982, P.O. Box 400, Saudi Arabia

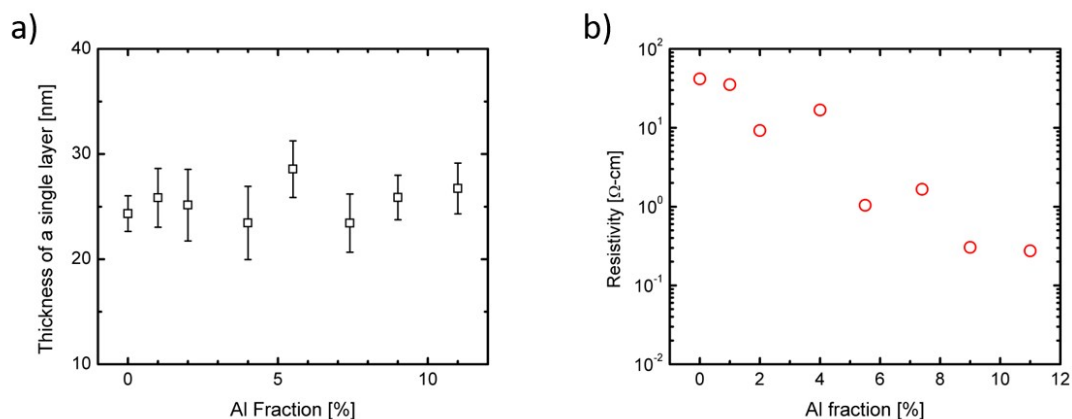

**Figure S1.** Thickness and resistivity of Al-doped ZnO nanoparticle thin films. The thickness was measured for the films with a single spin-coating.

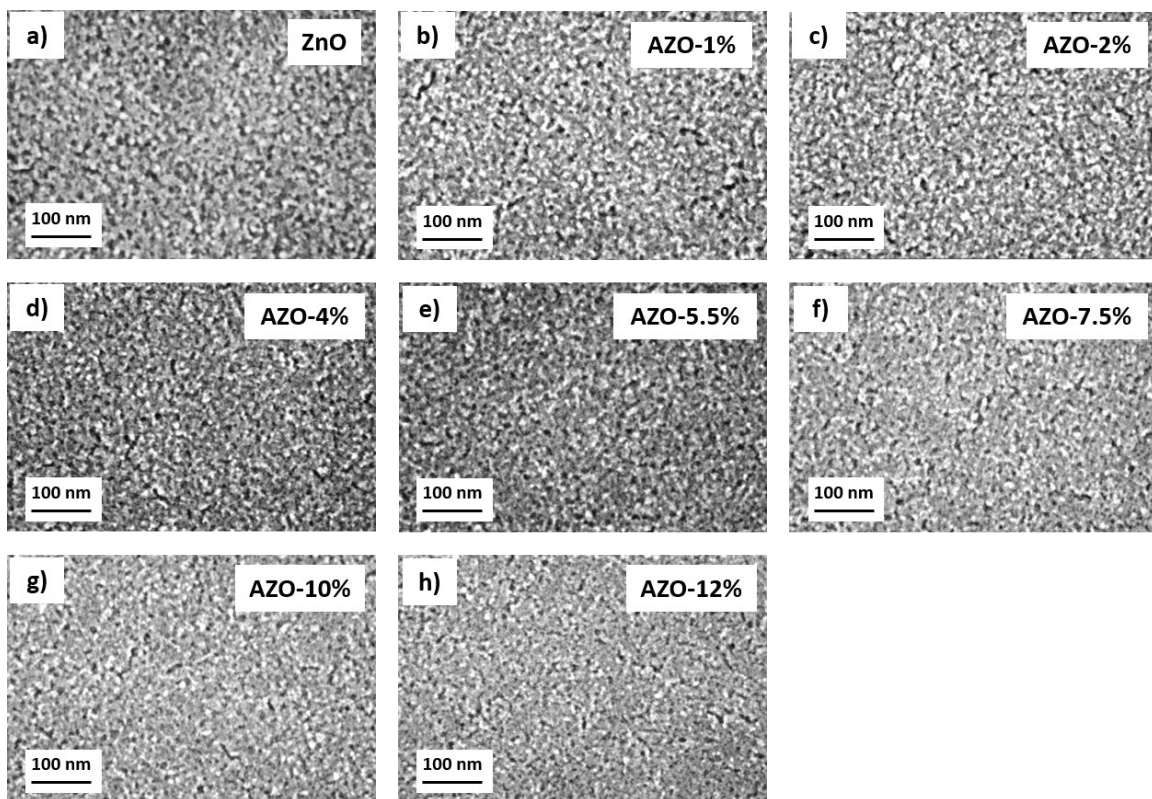

**Figure S2.** SEM images of 25 nm thick of ZnO nanoparticles doped with various fraction of Al coated on glass substrate. All sample was annealed at 250 °C.

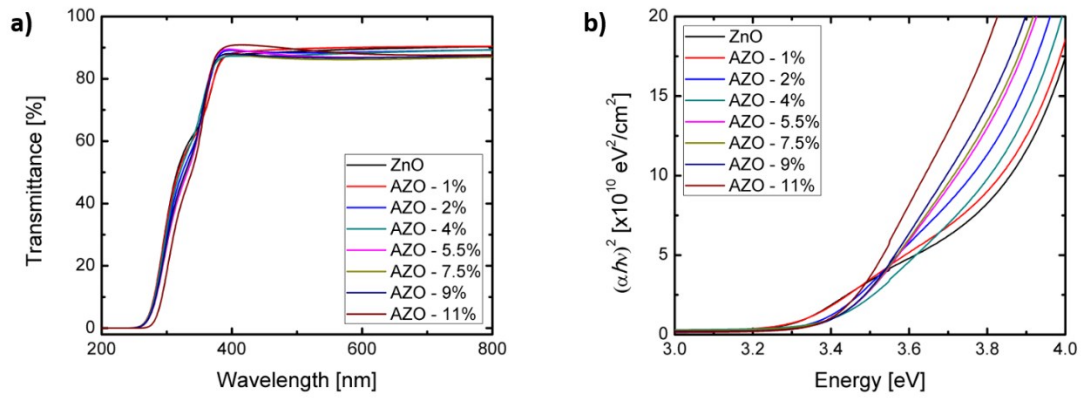

**Figure S3.** (a) Transmittance versus wavelength plot and (b)  $(\alpha h\nu)^2$  versus photon energy plot of  $\text{Al}_x\text{Zn}_{(1-x)}\text{O}$  nanoparticles,  $x$  ranged from 0 to 11 %, deposited on glass substrates.
